# Supplementary material for: Climate-change impact on reservoir evaporation and water availability in a tropical sub-humid region, north-eastern Brazil
Source: Copernicus journal article supplement (doi:10.5194/hess-2023-189), 2023-09-21

# Climate-change impact on reservoir evaporation and water availability in a tropical sub-humid region, north-eastern Brazil

Gláuber P. Rodrigues<sup>1,2</sup>, Arlena Brosinsky<sup>2,3</sup>, Ítalo S. Rodrigues<sup>4</sup>, George L. Mamede<sup>5</sup>, José C. de Araújo<sup>1</sup>

- 5 <sup>1</sup>Department of Agricultural Engineering, Federal University of Ceará, 60451-070 Fortaleza, Brazil  
<sup>2</sup>Institute for Environmental Sciences and Geography, University of Potsdam, Potsdam, Germany  
<sup>3</sup>Remote Sensing and Geoinformatics Section, German Research Centre for Geosciences (GFZ), Potsdam, Germany  
<sup>4</sup>Department of Geography, University of Lethbridge, Lethbridge, Alberta, Canada  
10 <sup>5</sup> Institute for Engineering and Sustainable Development, University of International Afro-Brazilian Integration, 62.790-000 Redenção, Brazil.  
Correspondence to: Gláuber P. Rodrigues ([pontesglauber@gmail.com](mailto:pontesglauber@gmail.com))

## Supplementary material 1 AquaSEBS overview

15

The Surface Energy Balance of Fresh and Saline Waters (AquaSEBS, as in Abdelrady *et al.*, 2016) is an adaptation of the SEBS model (Su, 2002) to estimate evaporation in open water. It consists of a set of tools to determine physical water surface parameters (such as albedo, emissivity, temperature etc.) from spectral  
20 reflectance and radiance. It requires three sets of data as input: (1) remote-sensing data including emissivity, surface albedo and water surface temperature; (2) meteorological data, including air pressure, air temperature, relative humidity and wind speed at a reference height; and (3) radiative forcing parameters, such as downward shortwave and long-wave radiations. The algorithm was validated in several water  
25 bodies at different environmental conditions (ABDEL RADY *et al.*, 2016; LOSGEDARAGH and RAHIMZADEGAN, 2018) including Brazilian tropical reservoirs (RODRIGUES *et al.*, 2021). AquaSEBS uses the energy balance to calculate the instantaneous latent heat flux of evaporation (Equation 1), thus, evaporation is calculated for each pixel of the image.

$$\lambda E_{inst} = R_n - G_{0W} - H \quad (S1)$$

30 where  $\lambda E_{inst}$  is latent heat flux of evaporation at imaging time ( $W m^{-2}$ ),  $R_n$  is net radiation flux at the surface ( $W m^{-2}$ ),  $G_{0W}$  is the water flux heat ( $W m^{-2}$ ), and  $H$  the sensible heat flux to air.

Afterwards, atmospheric transmissivity is obtained, which is defined as the fraction of incident radiation that is transmitted by the atmosphere and which represents the effects of absorption and reflection occurring within the atmosphere. This effect occurs to incoming radiation and to outgoing radiation and is, thus, squared in Equation 2. The  $\tau_{sw}$  includes transmissivity of both direct solar beam radiation and diffuse  
35 (scattered) radiation to the surface. We calculate  $\tau_{sw}$  using an elevation-based relationship from Allen *et al.* (2002).

$$\tau_{sw} = 0.75 + 2 \cdot 10^{-5} \cdot DEM \quad (S2)$$

Where DEM is the Digital Elevation Model file. The albedo at the top of the atmosphere (unadjusted for atmospheric transmissivity) was computed through linear combination of the monochromatic reflectance ( $\rho$ ) of the reflective bands (from 2 to 7, excluding band 6) according to Liang (2000) for MODIS products. It is necessary to apply radiometric corrections on images, and image bands are converted to radiance and reflectance according to their wavelengths, as follows:

$$\alpha = 0.160\rho_1 + 0.291\rho_2 + 0.243\rho_3 + 0.116\rho_4 + 0.112\rho_5 + 0.081\rho_7 - 0.0015 \quad (S3)$$

45

The indexes in each  $\rho$  stand for the respective reflectance band. Incoming shortwave radiation ( $\text{W m}^{-2}$ ) is calculated as:

$$R_{s\downarrow} = G_{sc} \cdot \cos(90^\circ - \theta) \cdot d_r \cdot \tau_{sw} \quad (S4)$$

50  $G_{sc}$  is the solar constant ( $1367 \text{ W m}^{-2}$ ),  $\theta$  the sun elevation angle and  $d_r$  is the inverse squared relative distance between sun and earth, all in conformity with Allen *et al.* (1998). Incoming longwave radiation is the downward thermal radiation flux from the atmosphere ( $\text{W m}^{-2}$ ). It is computed by means of the Stefan-Boltzmann equation:

$$R_{L\downarrow} = \varepsilon_a \cdot \sigma \cdot T_a^4 \quad (S5)$$

55 Where  $T_a$  is the near surface air temperature (monthly average, in K),  $\sigma$  is the Stefan-Boltzmann constant ( $5.67 \times 10^{-8} \text{ W m}^{-2} \text{ K}^{-4}$ ), and  $\varepsilon_a$  is the atmospheric emissivity (dimensionless). The following empirical equation by Bastiaanssen (1995) is used to assess  $\varepsilon_a$ :

$$\varepsilon_a = 0.85 \cdot (-\ln \tau_{sw})^{0.09} \quad (S6)$$

60 Water heat flux can be described as the imbalance between solar radiation, thermal radiation, sensible heat and latent heat fluxes. Remote sensing observations only obtain the skin temperature of the water; consequently the Equilibrium Temperature Model (ETM) was used. The ETM model (AHMAD and SAR, 1994) integrates water surface temperature ( $T_s$ ) and equilibrium temperature ( $T_e$ ) through the thermal exchange coefficient ( $\beta$ ) to estimate the water heat flux ( $G_w$ ). In order to derive water heat flux, the following equations (ABDELRAKY *et al.*, 2016) should be applied:

$$G_w = \beta (T_e - T_s) \quad (S7)$$

$$T_e = T_D + \frac{R_{L\downarrow}}{\beta} \quad (S8)$$

$$\beta = 4.5 + 0.05T_s + (\eta + 0.47)3.3u \quad (S9)$$

$$\eta = 0.35 + 0.015T_s + 0.0012 (T_n)^2 \quad (S10)$$

$$T_n = 0.5 (T_s - T_D) \quad (S11)$$

where  $T_e$  is equilibrium temperature ( $^\circ\text{C}$ ),  $T_D$  the dew temperature ( $^\circ\text{C}$ ),  $R_{s\downarrow}$  the incoming shortwave,  $u$  represents wind speed at 2m height ( $\text{m s}^{-1}$ ). The equation to calculate net radiation is given by:

$$R_n = (1 - \alpha) R_{sl} + \varepsilon \cdot R_{Ll} - \varepsilon \cdot \sigma \cdot T_s^4 \quad (S12)$$

According to Su (2002), the sensible heat flux at the wet-limit is obtained as follows

$$H_{wet} = \frac{\left( (R_n - G_{0w}) - \frac{\rho_a C_p}{r_{ew}} \cdot \frac{e_s - e}{\gamma} \right)}{\left( 1 + \frac{\Delta}{\gamma} \right)} \quad (S13)$$

The term  $e_s - e$  represents the vapour pressure deficit,  $C_p$  is the specific heat capacity of air ( $1004 \text{ J Kg}^{-1} \text{ }^\circ\text{C}^{-1}$ ),  $\rho_a$  the specific mass of air ( $1.184 \text{ Kg m}^{-3}$ ),  $\gamma$  is the psychrometric parameter ( $\text{hPa }^\circ\text{C}^{-1}$ ),  $\Delta$  is the rate of change of saturation vapour pressure with temperature ( $\text{hPa }^\circ\text{C}^{-1}$ ), while  $r_{ew}$  is external resistance and uses the variables wind friction and sensible heat flux.

Remote sensing images can be used to provide evaporation maps with high spatial resolution during overpass, but they are temporarily limited to a definite time during the day. A daily stable term such as the evaporative fraction (EF) can be used together with satellite images to upscale latent heat and the evaporation rate from instantaneous to daily estimation (Allen *et al.*, 2002; Abdelrady *et al.*, 2016). Evaporative fraction is the ratio between latent heat and available energy at the water surface, as follows:

$$EF = \frac{\lambda E}{(R_n - G_w)} \quad (S14)$$

Latent heat is the energy needed for evaporation (equation 1,  $\lambda E = R_n - G_{0w} - H_{wet}$ ). SEBS estimates the total energy used for evaporation in a day-based evaporative fraction term using Equation (Su, 2002). First, latent heat is converted to water depth in (mm) per day, then daily potential evaporation can be calculated as water depth utilising the following equation:

$$E_{daily} = 86400 \cdot EF (R_n - G_w) / \lambda E_{daily} \quad (S15)$$

$E_{daily}$  Ed in the previous equation is given in water depth (mm) for each pixel in the image.

## Supplementary material 2

### Bias correction of Eta-MIROC5 outputs using LS method

95

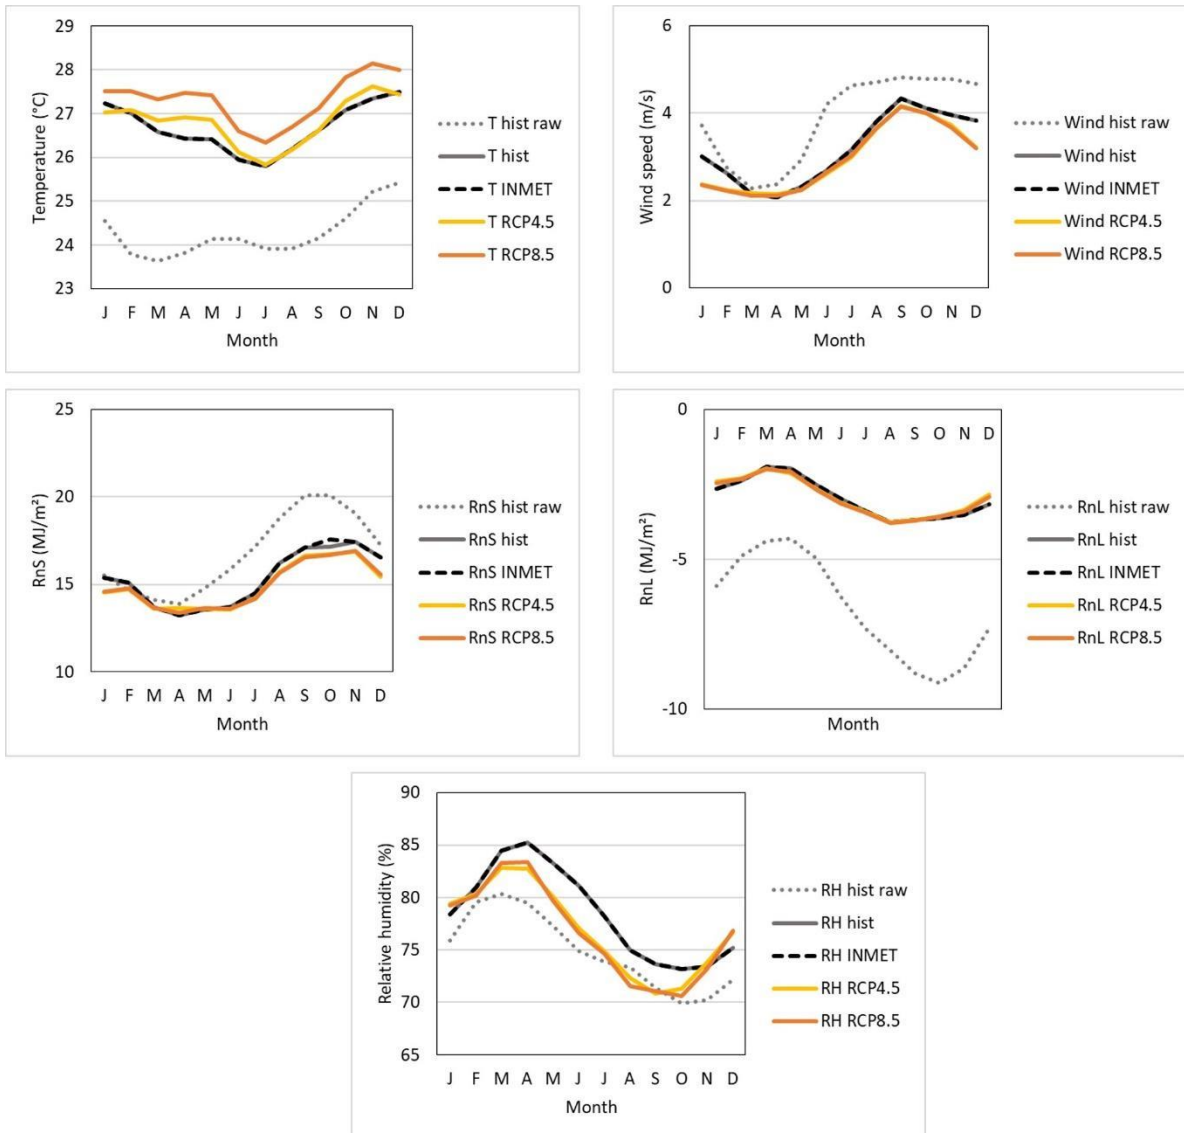

### Supplementary material 3

#### Bias correction of Eta-CanESM2 outputs applying LS method

100

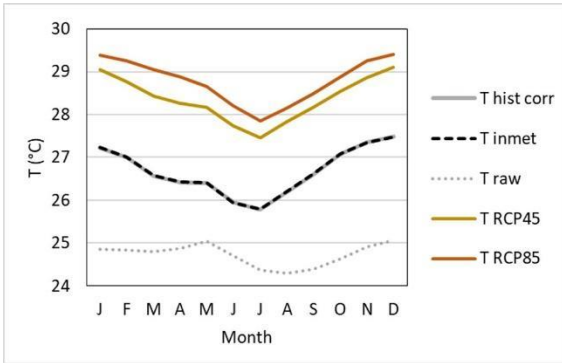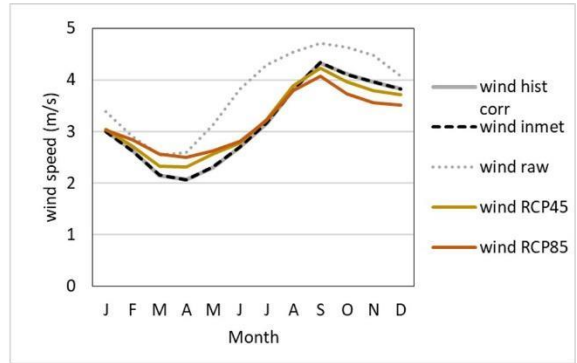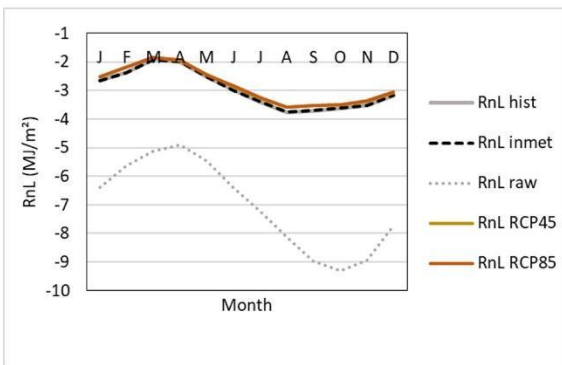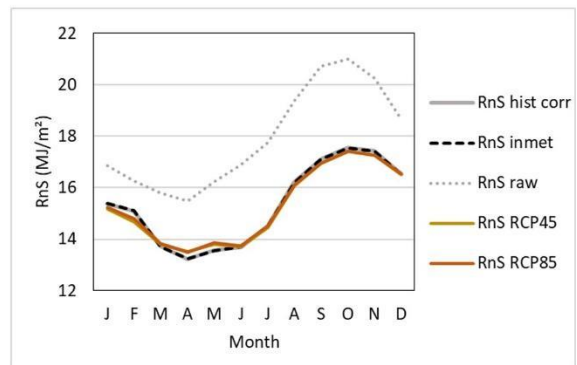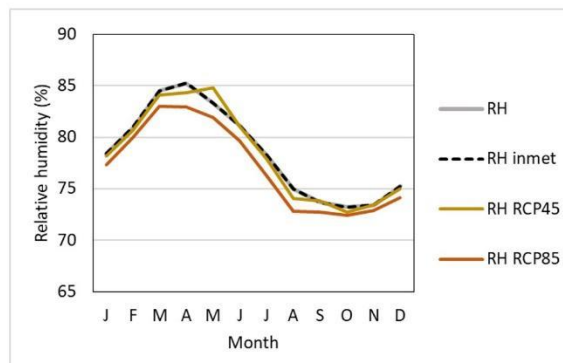

Supplement: Supplementary file 1 [file hess-2023-189-supplement.pdf]
